# Supplementary material
Source: PubMed Central journal article supplement (PMC1690908)
Supplement: 11886625s01.pdf [file 11886625s01.pdf]

This is an electronic appendix to the paper by Krüger & Davies 2002 The evolution of cuckoo parasitism: a comparative analysis. *Proc. R. Soc. Lond. B* **269**, 375-381.

Electronic appendices are refereed with the text. However, no attempt has been made to impose a uniform editorial style on the electronic appendices.

Appendix A. Raw data for the 136 cuckoo species used in the analyses. Abbreviations are: BS = breeding strategy, BW = body weight, BZ = body size, ES = egg size, SD = sexual plumage dimorphism, PH = parasite-host mass ratio, HS = host specialisation degree, D = diet type, H = habitat, HP = habitat productivity, SL = breeding season length, MP = migration pattern, RS = breeding range size and PS = population status. Genera names follow Hughes (2000) and the species sequence Payne (1997).

| Species                             | BS  | BW   | BZ  | ES  | SD | PH  | HS | D   | H   | HP  | SL  | MP  | RS   | PS |
|-------------------------------------|-----|------|-----|-----|----|-----|----|-----|-----|-----|-----|-----|------|----|
| <i>Oxylophus jacobinus serratus</i> | 3.0 | 72.0 | 34. | 27. | 0  | 2.2 | 4  | 3.0 | 1.0 | 500 | 3.0 | 3.0 | 6.50 | 6  |
| <i>Oxylophus jacobinus</i>          | 3.1 | 66.0 | 34. | 24. | 0  | 1.1 | 3  | 3.0 | 1.0 | 500 | 3.0 | 3.0 | 7.30 | 6  |
| <i>Oxylophus levaillantii</i>       | 3.1 | 124. | 39. | 26. | 0  | 1.6 | 4  | 3.0 | 2.0 | 550 | 6.0 | 3.0 | 7.50 | 6  |
| <i>Clamator coromandus</i>          | 3.1 | 77.0 | 46. | 27. | 0  | 0.9 | 4  | 3.0 | 3.0 | 600 | 5.0 | 2.5 | 6.78 | 5  |
| <i>Clamator glandarius</i>          | 3.2 | 124. | 37. | 33. | 0  | 0.3 | 3  | 4.5 | 1.0 | 500 | 2.0 | 2.0 | 7.05 | 5  |
| <i>Pachycoccyx audeberti</i>        | 3.3 | 115. | 36. | 24. | 0  | 4.1 | 4  | 3.0 | 1.5 | 450 | 5.0 | 0.0 | 6.91 | 4  |
| <i>Cuculus crassirostris</i>        |     |      | 34. |     | 0  |     |    | 3.0 | 3.0 | 700 |     | 0.0 | 4.97 | 5  |
| <i>Cuculus sparverioides</i>        |     | 150. | 39. | 27. | 0  | 2.7 | 4  | 2.5 | 2.0 | 600 | 2.0 | 2.0 | 6.79 | 7  |
| <i>Cuculus varius</i>               | 3.3 | 104. | 33. | 27. | 0  | 1.4 | 4  | 3.6 | 2.0 | 550 | 4.0 | 0.0 | 6.60 | 6  |
| <i>Cuculus vagans</i>               |     | 56.0 | 26. |     | 0  |     | 4  | 3.0 | 2.5 | 700 | 3.0 | 0.0 | 6.19 | 5  |
| <i>Cuculus fugax</i>                | 3.3 | 83.0 | 29. | 24. | 0  | 5.8 | 4  | 2.5 | 2.5 | 550 | 4.0 | 2.0 | 6.95 | 5  |
| <i>Cuculus pectoralis</i>           |     | 80.0 | 28. |     | 0  |     |    | 2.5 | 3.0 | 700 |     | 0.0 | 5.43 | 5  |
| <i>Cuculus solitarius</i>           | 3.3 | 75.0 | 31. | 22. | 1  | 2.8 | 4  | 3.7 | 2.0 | 650 | 4.0 | 2.0 | 7.11 | 6  |
| <i>Cuculus clamosus</i>             | 3.3 | 85.0 | 31. | 25. | 1  | 1.7 | 4  | 5.5 | 2.0 | 600 | 2.0 | 2.0 | 7.08 | 6  |
| <i>Cuculus micropterus</i>          | 3.3 | 119. | 32. | 25. | 2  | 2.7 | 3  | 2.5 | 2.0 | 550 | 5.0 | 1.0 | 7.01 | 7  |
| <i>Cuculus canorus</i>              | 3.3 | 115. | 32. | 23. | 2  | 7.1 | 1  | 3.0 | 2.0 | 175 | 2.0 | 4.0 | 7.69 | 6  |
| <i>Cuculus gularis</i>              | 3.3 | 110. | 32. | 25. | 3  | 1.5 | 4  | 3.0 | 1.0 | 600 | 4.0 | 3.0 | 7.06 | 7  |
| <i>Cuculus saturatus</i>            | 3.3 | 90.6 | 29. | 21. | 2  | 11. | 2  | 2.5 | 2.0 | 550 | 2.0 | 2.5 | 6.57 | 6  |
| <i>Cuculus horsfieldi</i>           | 3.3 | 99.0 | 31. | 22. | 2  | 7.1 | 2  | 3.0 | 2.0 | 150 | 2.0 | 4.0 | 7.21 | 6  |
| <i>Cuculus poliocephalus</i>        |     | 52.0 | 25. | 21. | 1  | 3.3 | 3  | 3.0 | 2.0 | 400 | 3.0 | 4.0 | 6.69 | 7  |
| <i>Cuculus rochii</i>               |     | 64.0 | 26. | 18. | 0  | 7.8 | 4  | 3.0 | 2.0 | 450 | 7.0 | 3.0 | 5.76 | 6  |
| <i>Cuculus pallidus</i>             | 3.3 | 82.0 | 31. | 25. | 0  | 3.4 | 1  | 3.0 | 1.0 | 200 | 4.0 | 2.0 | 6.88 | 6  |
| <i>Cercococcyx mechowi</i>          | 3.3 | 55.0 | 32. | 23. | 0  | 5.7 | 4  | 2.6 | 3.0 | 700 | 3.0 | 0.0 | 6.33 | 5  |
| <i>Cercococcyx olivinus</i>         | 3.3 | 65.0 | 33. | 23. | 0  | 6.5 | 4  | 3.0 | 3.0 | 700 | 3.0 | 0.0 | 6.17 | 5  |
| <i>Cercococcyx montanus</i>         | 3.3 | 54.0 | 33. | 21. | 0  | 2.9 | 4  | 3.0 | 3.0 | 650 | 4.0 | 0.0 | 6.10 | 5  |
| <i>Penthoceryx sonneratii</i>       | 3.3 | 37.0 | 22. | 18. | 0  | 3.6 | 4  | 3.0 | 2.5 | 650 | 6.0 | 0.0 | 6.84 | 7  |
| <i>Cacomantis merulinus</i>         | 3.3 | 23.5 | 20. | 18. | 1  | 3.0 | 3  | 2.5 | 2.0 | 650 | 4.0 | 0.0 | 6.92 | 6  |
| <i>Cacomantis variolosus</i>        | 3.3 | 34.0 | 24. | 19. | 0  | 2.7 | 1  | 3.5 | 3.0 | 650 | 4.5 | 0.0 | 6.65 | 6  |
| <i>Cacomantis heinrichi</i>         |     |      | 23. |     | 0  |     |    | 3.0 | 3.0 | 700 |     | 0.0 | 4.37 | 2  |
| <i>Cacomantis castaneiventris</i>   | 3.3 | 34.0 | 24. | 19. | 0  | 3.9 | 4  | 3.0 | 3.0 | 700 | 4.0 | 0.0 | 6.02 | 4  |

|                                     |     |      |     |     |   |     |   |     |     |     |     |     |      |   |
|-------------------------------------|-----|------|-----|-----|---|-----|---|-----|-----|-----|-----|-----|------|---|
| <i>Cacomantis flabelliformis</i>    | 3.3 | 44.0 | 26. | 21. | 0 | 3.8 | 2 | 3.0 | 2.0 | 600 | 4.5 | 1.0 | 6.27 | 6 |
| <i>Misocalius osculans</i>          | 3.3 | 30.0 | 20. | 20. | 0 | 2.3 | 4 | 2.0 | 1.0 | 225 | 5.0 | 1.0 | 6.82 | 7 |
| <i>Chalcites basalis</i>            | 3.3 | 22.0 | 17. | 18. | 0 | 2.4 | 2 | 3.0 | 1.0 | 200 | 3.0 | 1.0 | 6.88 | 6 |
| <i>Chalcites minutillus</i>         | 3.3 | 17.0 | 15. | 20. | 1 | 2.5 | 3 | 3.0 | 2.5 | 700 | 5.0 | 1.0 | 6.41 | 7 |
| <i>Chalcites lucidus</i>            | 3.3 | 23.0 | 17. | 18. | 1 | 2.8 | 2 | 3.0 | 1.5 | 400 | 4.0 | 3.0 | 6.34 | 6 |
| <i>Chalcites ruficollis</i>         |     | 23.5 | 16. |     | 1 |     |   | 3.0 | 3.0 | 700 |     |     | 5.34 | 3 |
| <i>Chalcites meyeri</i>             |     | 20.0 | 15. |     | 2 |     |   | 3.0 | 2.5 | 700 |     |     | 5.82 | 2 |
| <i>Chalcites maculatus</i>          | 3.3 | 24.0 | 17. | 17. | 3 | 2.6 | 4 | 3.0 | 3.0 | 400 | 4.0 | 1.0 | 6.47 | 4 |
| <i>Chalcites xanthorhynchus</i>     | 3.3 | 21.0 | 16. |     | 4 | 2.3 | 4 | 2.5 | 2.5 | 700 |     | 0.0 | 6.61 | 4 |
| <i>Chrysococcyx flavigularis</i>    |     | 30.0 | 19. |     | 3 |     |   | 2.5 | 3.0 | 700 |     | 0.0 | 6.35 | 5 |
| <i>Chrysococcyx klaas</i>           | 3.3 | 26.0 | 18. | 19. | 3 | 2.6 | 2 | 3.0 | 2.0 | 600 | 5.5 | 2.0 | 7.18 | 6 |
| <i>Chrysococcyx cupreus</i>         | 3.3 | 38.0 | 20. | 20. | 3 | 1.8 | 2 | 3.0 | 2.0 | 650 | 5.0 | 1.0 | 7.06 | 7 |
| <i>Chrysococcyx caprius</i>         | 3.3 | 32.0 | 19. | 21. | 4 | 1.2 | 2 | 4.0 | 1.0 | 500 | 5.0 | 2.0 | 7.29 | 6 |
| <i>Rhamphomantis</i>                |     | 31.0 | 18. |     | 2 |     |   | 3.0 | 2.5 | 700 |     |     | 4.99 | 3 |
| <i>Surniculus lugubris</i>          | 3.3 | 35.0 | 25. | 20. | 0 | 1.6 | 2 | 2.5 | 2.5 | 650 | 6.0 | 1.0 | 6.78 | 5 |
| <i>Surniculus velutinus</i>         |     | 36.0 | 23. |     | 0 |     |   | 3.0 | 3.0 | 700 |     | 0.0 | 5.47 | 7 |
| <i>Caliechthrus leucolophus</i>     |     | 117. | 33. |     | 0 |     |   | 2.5 | 3.0 | 700 |     |     | 5.77 | 5 |
| <i>Microdynamis parva</i>           |     | 43.0 | 20. |     | 3 |     |   | 2.0 | 3.0 | 700 |     | 0.0 | 5.92 | 7 |
| <i>Eudynamys scolopacea</i>         | 3.1 | 260. | 44. | 43. | 4 | 0.6 | 2 | 2.0 | 2.0 | 500 | 5.0 | 1.0 | 6.70 | 6 |
| <i>Eudynamys sco. cyanocephala</i>  | 3.3 | 234. | 39. | 34. | 4 | 1.7 | 2 | 2.0 | 2.0 | 500 | 4.0 | 3.0 | 6.17 | 6 |
| <i>Urodynamys taitensis</i>         | 3.3 | 120. | 40. | 23. | 0 | 6.6 | 4 | 5.6 | 2.0 | 500 | 2.0 | 4.0 | 5.42 | 5 |
| <i>Scythrops novaehollandiae</i>    | 3.1 | 613. | 60. | 44. | 0 | 1.2 | 2 | 2.0 | 2.0 | 550 | 3.5 | 3.0 | 6.39 | 5 |
| <i>Ceuthmochares aereus</i>         | 0.0 | 66.0 | 33. | 30. | 0 |     |   | 3.0 | 3.0 | 650 | 3.0 | 0.0 | 6.86 | 6 |
| <i>Rhopodytes diardi</i>            | 0.0 | 57.0 | 38. | 30. | 0 |     |   | 3.0 | 3.0 | 700 | 2.0 | 0.0 | 6.15 | 6 |
| <i>Rhopodytes sumatranus</i>        | 0.0 | 114. | 40. | 27. | 0 |     |   | 3.0 | 3.0 | 700 | 2.0 | 0.0 | 6.15 | 7 |
| <i>Rhopodytes tristis</i>           | 0.0 | 115. | 50. | 34. | 0 |     |   | 4.5 | 3.0 | 650 | 4.0 | 0.0 | 6.65 | 7 |
| <i>Rhopodytes viridirostris</i>     | 0.0 | 77.0 | 39. | 29. | 0 |     |   | 3.6 | 2.0 | 550 | 6.0 | 0.0 | 6.14 | 6 |
| <i>Phaenicophaeus leschenaultii</i> | 0.0 | 174. | 43. | 36. | 0 |     |   | 3.6 | 2.0 | 500 | 3.0 | 0.0 | 6.53 | 3 |
| <i>Rhinorta chlorophaeus</i>        | 0.0 | 52.5 | 32. | 33. | 3 |     |   | 3.0 | 2.5 | 700 | 4.0 | 0.0 | 6.15 | 6 |
| <i>Phaenicophaeus javanicus</i>     | 0.0 | 98.0 | 42. | 29. | 0 |     |   | 3.0 | 2.0 | 700 | 3.0 | 0.0 | 6.19 | 5 |
| <i>Rhamphococcyx</i>                | 0.0 |      | 53. | 36. | 0 |     |   | 3.0 | 2.0 | 700 | 2.0 | 0.0 | 5.27 | 6 |
| <i>Rhamphococcyx curvirostris</i>   | 0.0 | 122. | 45. | 39. | 0 |     |   | 6.5 | 3.0 | 700 | 3.0 | 0.0 | 6.19 | 7 |
| <i>Phaenicophaeus</i>               | 0.0 |      | 46. | 36. | 0 |     |   | 2.0 | 3.0 | 600 | 5.0 | 0.0 | 4.81 | 2 |
| <i>Dasylophus superciliosus</i>     | 0.0 | 117. | 38. | 30. | 0 |     |   | 4.5 | 2.5 | 700 | 2.0 | 0.0 | 5.00 | 7 |
| <i>Lepidogrammus cumingi</i>        | 0.0 | 173. | 42. | 34. | 0 |     |   | 4.5 | 3.0 | 700 | 3.0 | 0.0 | 5.07 | 6 |
| <i>Carpococcyx viridis</i>          | 0.0 |      | 55. |     | 0 |     |   | 3.0 | 3.0 | 700 |     | 0.0 | 4.67 | 2 |
| <i>Carpococcyx radiatus</i>         | 0.0 |      | 60. | 47. | 0 |     |   | 2.5 | 3.0 | 700 |     | 0.0 | 5.87 | 2 |
| <i>Carpococcyx renauldi</i>         | 0.0 | 400. | 65. | 44. | 0 |     |   | 6.5 | 3.0 | 700 | 3.0 | 0.0 | 5.88 | 4 |
| <i>Coua delalandei</i>              | 0.0 |      | 56. |     | 0 |     |   | 4.0 | 3.0 | 300 |     | 0.0 | 0.00 | 0 |
| <i>Coua gigas</i>                   | 0.0 | 415. | 60. | 43. | 0 |     |   | 3.0 | 2.0 | 500 |     | 0.0 | 5.30 | 5 |
| <i>Coua coquereli</i>               | 0.0 | 135. | 42. | 33. | 0 |     |   | 2.5 | 2.0 | 400 |     | 0.0 | 5.27 | 7 |
| <i>Coua serriana</i>                | 0.0 | 298. | 42. |     | 0 |     |   | 2.0 | 3.0 | 500 |     | 0.0 | 5.07 | 7 |
| <i>Coua reynaudii</i>               | 0.0 | 145. | 39. | 36. | 0 |     |   | 3.0 | 3.0 | 500 | 6.0 | 0.0 | 5.16 | 7 |
| <i>Coua cursor</i>                  | 0.0 | 118. | 37. | 34. | 0 |     |   | 3.0 | 1.0 | 500 | 3.0 | 0.0 | 4.81 | 5 |
| <i>Coua ruficeps</i>                | 0.0 | 190. | 42. | 35. | 0 |     |   | 2.5 | 2.0 | 500 | 2.0 | 0.0 | 5.29 | 6 |
| <i>Coua cristata</i>                | 0.0 | 136. | 42. | 35. | 0 |     |   | 3.2 | 1.5 | 450 |     | 0.0 | 5.54 | 6 |
| <i>Coua verreauxi</i>               | 0.0 |      | 36. |     | 0 |     |   | 2.5 | 1.0 | 400 | 2.0 | 0.0 | 4.37 | 3 |
| <i>Coua caerulea</i>                | 0.0 | 235. | 49. | 37. | 0 |     |   | 4.0 | 2.5 | 500 | 6.0 | 0.0 | 5.29 | 6 |
| <i>Centropus celebensis</i>         | 0.0 |      | 47. |     | 0 |     |   | 3.0 | 3.0 | 700 |     | 0.0 | 5.27 | 6 |
| <i>Centropus unirufus</i>           | 0.0 | 184. | 40. |     | 0 |     |   |     | 2.5 | 700 |     | 0.0 | 5.04 | 4 |
| <i>Centropus melanops</i>           | 0.0 | 213. | 45. | 37. | 0 |     |   |     | 3.0 | 700 |     | 0.0 | 5.07 | 6 |
| <i>Centropus nigrorufus</i>         | 0.0 |      | 46. | 39. | 0 |     |   | 4.0 | 2.0 | 700 |     | 0.0 | 5.12 | 2 |
| <i>Centropus milo</i>               | 0.0 |      | 64. |     | 0 |     |   | 3.0 | 3.0 | 700 |     | 0.0 | 3.90 | 6 |
| <i>Centropus goliath</i>            | 0.0 |      | 66. |     | 0 |     |   |     | 2.5 | 700 |     | 0.0 | 4.60 | 6 |

|                                  |     |      |     |     |   |     |   |     |     |     |     |     |      |   |
|----------------------------------|-----|------|-----|-----|---|-----|---|-----|-----|-----|-----|-----|------|---|
| <i>Centropus violaceus</i>       | 0.0 | 500. | 64. | 42. | 0 |     |   | 4.0 | 3.0 | 700 |     | 0.0 | 4.66 | 4 |
| <i>Centropus menbeki</i>         | 0.0 | 517. | 63. | 37. | 0 |     |   | 6.0 | 3.0 | 700 | 4.0 | 0.0 | 5.94 | 5 |
| <i>Centropus ateralbus</i>       | 0.0 | 336. | 46. | 41. | 0 |     |   | 6.0 | 3.0 | 700 |     | 0.0 | 4.66 | 5 |
| <i>Centropus phasianinus</i>     | 0.0 | 340. | 66. | 38. | 1 |     |   | 6.7 | 2.5 | 650 | 6.0 | 0.0 | 6.33 | 5 |
| <i>Centropus spilopterus</i>     | 0.0 |      | 60. | 36. | 0 |     |   |     |     | 700 |     | 0.0 | 3.15 | 2 |
| <i>Centropus bernsteini</i>      | 0.0 | 160. | 49. | 32. | 0 |     |   |     | 2.0 | 700 |     | 0.0 | 5.77 | 5 |
| <i>Centropus chalybeus</i>       | 0.0 |      | 45. |     | 0 |     |   |     | 3.0 | 700 |     | 0.0 | 3.69 | 2 |
| <i>Centropus rectunguis</i>      | 0.0 | 163. | 43. | 37. | 0 |     |   | 3.0 | 3.0 | 700 |     | 0.0 | 6.13 | 2 |
| <i>Centropus steerii</i>         | 0.0 |      | 46. |     | 0 |     |   |     | 3.0 | 700 |     | 0.0 | 3.98 | 1 |
| <i>Centropus sinensis</i>        | 0.0 | 252. | 49. | 36. | 0 |     |   | 6.3 | 1.5 | 600 | 6.0 | 0.0 | 6.90 | 6 |
| <i>Centropus andamanensis</i>    | 0.0 | 234. | 46. | 35. | 0 |     |   | 3.0 | 2.0 | 700 | 6.0 | 0.0 | 3.92 | 6 |
| <i>Centropus viridis</i>         | 0.0 | 165. | 42. | 27. | 0 |     |   | 3.0 | 1.5 | 700 | 4.0 | 0.0 | 5.47 | 6 |
| <i>Centropus toulou</i>          | 0.0 | 150. | 43. | 33. | 0 |     |   | 6.7 | 3.0 | 450 | 7.0 | 0.0 | 5.76 | 7 |
| <i>Centropus grillii</i>         | 0.0 | 125. | 32. | 31. | 0 |     |   | 3.6 | 0.5 | 650 | 3.5 | 0.0 | 7.04 | 4 |
| <i>Centropus bengalensis</i>     | 0.0 | 120. | 34. | 28. | 0 |     |   | 4.5 | 2.0 | 650 | 6.5 | 0.0 | 6.86 | 6 |
| <i>Centropus chlororhynchus</i>  | 0.0 |      | 44. | 35. | 0 |     |   | 5.0 | 3.0 | 650 | 3.0 | 0.0 | 4.64 | 1 |
| <i>Centropus leucogaster</i>     | 0.0 | 315. | 52. | 38. | 0 |     |   | 4.0 | 3.0 | 700 | 5.0 | 0.0 | 6.27 | 6 |
| <i>Centropus anelli</i>          | 0.0 | 230. | 52. |     | 0 |     |   | 5.0 | 3.0 | 700 | 3.0 | 0.0 | 6.14 | 6 |
| <i>Centropus monachus</i>        | 0.0 | 204. | 48. | 34. | 0 |     |   | 6.7 | 2.0 | 650 | 5.0 | 0.0 | 6.69 | 6 |
| <i>Centropus cupreicaudus</i>    | 0.0 | 285. | 46. | 38. | 0 |     |   | 6.7 | 2.0 | 500 | 5.0 | 0.0 | 6.32 | 5 |
| <i>Centropus senegalensis</i>    | 0.0 | 170. | 39. | 34. | 0 |     |   | 6.7 | 2.5 | 550 | 6.0 | 0.0 | 6.97 | 6 |
| <i>Centropus superciliosus</i>   | 0.0 | 170. | 39. | 34. | 0 |     |   | 6.7 | 2.5 | 500 | 6.0 | 0.0 | 6.92 | 6 |
| <i>Coccyzus pumilus</i>          | 1.0 | 36.0 | 21. | 25. | 0 | 1.0 |   | 3.0 | 2.5 | 800 | 12. | 0.0 | 6.31 | 7 |
| <i>Coccyzus cinereus</i>         | 0.0 | 45.0 | 25. | 25. | 0 |     |   | 3.0 | 2.0 | 700 |     | 0.0 | 6.72 | 5 |
| <i>Coccyzus erythrophthalmus</i> | 2.0 | 50.5 | 30. | 27. | 0 | 1.0 | 3 | 4.2 | 2.0 | 250 | 4.0 | 4.0 | 6.78 | 6 |
| <i>Coccyzus americanus</i>       | 2.0 | 63.0 | 30. | 30. | 0 | 1.0 | 3 | 5.0 | 2.0 | 275 | 5.0 | 4.0 | 6.97 | 6 |
| <i>Coccyzus eulerei</i>          | 0.0 | 61.0 | 28. |     | 0 |     |   | 3.0 | 3.0 | 800 |     | 0.0 | 6.98 | 3 |
| <i>Coccyzus minor</i>            | 0.0 | 64.0 | 34. | 31. | 0 |     |   | 3.6 | 2.0 | 750 | 4.0 | 0.0 | 6.31 | 6 |
| <i>Coccyzus ferrugineus</i>      | 0.0 | 70.0 | 32. |     | 0 |     |   | 4.5 | 3.0 | 800 |     | 0.0 | 1.67 | 2 |
| <i>Coccyzus melacoryphus</i>     | 0.0 | 50.0 | 27. | 30. | 0 |     |   | 3.0 | 2.5 | 750 | 3.0 | 0.0 | 7.13 | 7 |
| <i>Coccyzus lansbergi</i>        | 0.0 | 47.0 | 26. | 26. | 0 |     |   | 3.0 | 2.0 | 800 |     | 3.0 | 5.69 | 3 |
| <i>Saurothera merlini</i>        | 0.0 | 154. | 54. | 40. | 0 |     |   | 4.5 | 3.0 | 500 |     | 0.0 | 5.08 | 6 |
| <i>Saurothera vieilloti</i>      | 0.0 | 80.0 | 42. | 34. | 0 |     |   | 4.5 | 2.5 | 500 | 5.0 | 0.0 | 3.95 | 6 |
| <i>Saurothera longirostris</i>   | 0.0 | 104. | 42. | 37. | 0 |     |   | 5.3 | 2.5 | 500 | 4.0 | 0.0 | 4.89 | 6 |
| <i>Saurothera vetula</i>         | 0.0 | 95.0 | 40. | 32. | 0 |     |   | 5.6 | 3.0 | 500 |     | 0.0 | 4.04 | 5 |
| <i>Hyetornis pluvialis</i>       | 0.0 | 130. | 50. | 37. | 0 |     |   | 6.7 | 2.5 | 500 | 2.0 | 0.0 | 4.04 | 5 |
| <i>Hyetornis rufigularis</i>     | 0.0 | 128. | 48. |     | 0 |     |   | 6.7 | 2.5 | 500 | 2.0 | 0.0 | 4.88 | 2 |
| <i>Piaya cayana</i>              | 0.0 | 98.0 | 46. | 35. | 0 |     |   | 3.0 | 3.0 | 800 | 6.0 | 0.0 | 7.17 | 7 |
| <i>Piaya melanogaster</i>        | 0.0 | 102. | 38. | 30. | 0 |     |   | 3.0 | 2.5 | 800 |     | 0.0 | 6.65 | 5 |
| <i>Coccyua minuta</i>            | 0.0 | 40.0 | 25. | 24. | 0 |     |   | 3.0 | 3.0 | 800 | 4.0 | 0.0 | 6.81 | 5 |
| <i>Crotophaga major</i>          | 1.0 | 153. | 46. | 45. | 0 | 1.0 |   | 3.6 | 3.0 | 800 | 7.0 | 0.0 | 7.10 | 7 |
| <i>Crotophaga ani</i>            | 1.0 | 105. | 35. | 35. | 0 | 1.0 |   | 5.0 | 2.0 | 750 | 8.0 | 0.0 | 7.18 | 6 |
| <i>Crotophaga sulcirostris</i>   | 1.0 | 75.0 | 32. | 31. | 0 | 1.0 |   | 3.6 | 2.0 | 700 | 5.0 | 0.0 | 6.55 | 8 |
| <i>Guira guira</i>               | 2.0 | 141. | 36. | 28. | 0 | 1.2 | 4 | 5.3 | 1.0 | 750 | 3.0 | 0.0 | 6.89 | 6 |
| <i>Tapera naevia</i>             | 3.3 | 52.0 | 27. | 22. | 0 | 3.7 | 2 | 3.0 | 1.5 | 750 | 9.0 | 0.0 | 7.19 | 6 |
| <i>Dromococcyx phasianellus</i>  | 3.3 | 80.0 | 36. | 24. | 0 | 5.3 | 3 | 4.5 | 3.0 | 800 | 3.0 | 0.0 | 7.07 | 4 |
| <i>Dromococcyx pavonicus</i>     | 3.3 | 48.0 | 28. | 21. | 0 | 3.2 | 3 | 3.0 | 3.0 | 800 |     | 0.0 | 6.94 | 4 |
| <i>Morococcyx erythropygus</i>   | 0.0 | 62.0 | 25. | 27. | 0 |     |   | 3.0 | 1.5 | 650 | 3.0 | 0.0 | 5.74 | 7 |
| <i>Geococcyx californianus</i>   | 0.0 | 305. | 56. | 39. | 1 |     |   | 6.7 | 0.5 | 150 | 4.5 | 0.0 | 6.43 | 6 |
| <i>Geococcyx velox</i>           | 0.0 | 178. | 48. | 35. | 0 |     |   | 3.0 | 0.0 | 500 | 2.5 | 0.0 | 5.85 | 7 |
| <i>Neomorphus geoffroyi</i>      | 0.0 | 345. | 50. | 40. | 0 |     |   | 3.6 | 3.0 | 800 | 4.0 | 0.0 | 6.45 | 3 |
| <i>Neomorphus radiolus</i>       | 0.0 |      | 50. |     | 0 |     |   |     | 3.0 | 800 |     | 0.0 | 5.54 | 1 |
| <i>Neomorphus rufipennis</i>     | 0.0 |      | 50. | 40. | 1 |     |   |     | 3.0 | 800 |     | 0.0 | 5.87 | 3 |
| <i>Neomorphus pucheranii</i>     | 0.0 |      | 50. |     | 0 |     |   | 3.0 | 3.0 | 800 |     | 0.0 | 6.03 | 3 |

REFERENCES:

Hughes, J. M. 2000 Monophyly and phylogeny of cuckoos (Aves, Cuculidae) inferred from osteological characters. *Zool. J. Linn. Soc.* **130**, 263-307.

Payne, R. B. 1977 The ecology of brood parasitism in birds. *Ann. Rev. Ecol. Syst.* **8**, 1-28.
